# Supplementary material
Source: PubMed Central journal article supplement (PMC2879799)
Supplement: pp.109.151225_1.pdf [file pp.109.151225_1.pdf]

## Supplemental Figure Legends

**Supplemental Figure S1. Two independent transient expression experiments of *AtHSBP-GFP* in mesophyll protoplasts.** Wild-type Arabidopsis protoplasts were transfected with the *AtHSBP-GFP* construct and treated without HS (CK) or with HS at 37°C for 1 h (H1R0) and then recovered from HS for 1 h (H1R1) or 2 h (H1R2) as described in Fig. 5A. A. Two independent experiments with similar results are shown in Fig. 5A. B, Five continuous confocal scans with 1 µm optical sectioning thickness and the confocal plane of sequential-3 as the representative shown in Fig. 5A, H1R1. Scale bars indicate 20 µm.

**Supplemental Figure S2. Transient expression of a control construct, *GUS-GFP*, in mesophyll protoplasts.** Wild-type mesophyll protoplasts were transfected with the *GUS-GFP* construct and were treated without HS (CK) or with HS at 37°C for 1 h (H1R0) then recovered from HS for 1 h (H1R1). Similar results were obtained from 3 independent replicates, and representative images are shown. The scale bar indicates 20 µm.

**Supplemental Figure S3. Transient expression of the *AtHSBP-GFP* in *Athsbp-1* mutant mesophyll protoplasts.** The *Athsbp-1* protoplasts were transfected with the construct of *AtHSBP-GFP*, and treated without HS (CK) or with HS at 37°C for 1 h (H1R0) and then recovered from HS for 1 h (H1R1) or 2 h (H1R2) as described in Fig. 5. The scale bar indicates 20 µm.

**Supplemental Figure S4. *AtHSBP* and *HSP* gene expression were analyzed by real-time quantitative PCR and normalized by the internal control, *EF1α*.** *EF1α* (At5g60390) transcript was the quantitative control compared with *AtACT2* for *AtHSBP* (A) and *HSP* (B) gene expression analysis, as shown in the Figs. 2A and 8A, respectively.



**Supplemental Table S1. Comparison (percent identity, percent similarity) of the amino acid sequences of the  $\alpha$ -helix region for AtHSBP and other organisms.**

| Gene           | Local Name        | Accession Number | Genus Species                  | % Identity | % Similarity |
|----------------|-------------------|------------------|--------------------------------|------------|--------------|
| AtHSBP         | Arabidopsis       | NP_849392.4      | <i>Arabidopsis thaliana</i>    |            |              |
| LeHSBP1        | Tomato            | AW624356         | <i>Lycopersicon esculentum</i> | 84         | 93           |
| ZmHSBP1 (EMP2) | Maize             | AAM15929         | <i>Zea mays</i>                | 76         | 91           |
| ZmHSBP2        | Maize             | AAR18070         | <i>Zea mays</i>                | 78         | 91           |
| OsHSBP1        | Rice              | AU075659         | <i>Oryza sativa</i>            | 71         | 91           |
| OsHSBP2        | Rice              | BE040146         | <i>Oryza sativa</i>            | 80         | 93           |
| HsHSBP1        | Human             | NP_001528        | <i>Homo sapiens</i>            | 62         | 84           |
| MmHSBP1        | Mouse             | NP_077181        | <i>Mus musculus</i>            | 58         | 80           |
| XtHSBP1        | Xenopus           | NP_001011422     | <i>Xenopus tropicalis</i>      | 64         | 82           |
| DrHSBP1        | Zebrafish         | AAH59566         | <i>Danio rerio</i>             | 62         | 82           |
| CeHSBP1        | <i>C. elegans</i> | NP_502406        | <i>Caenorhabditis elegans</i>  | 58         | 78           |

The comparison of the  $\alpha$ -helix region among different organisms was analyzed by Vector NTI 10 (Invitrogen).

**Supplemental Table S2. Primers for genotyping, cloning, mutation, real-time quantitative PCR and EMSA.** Restriction enzyme sites were underlined as indicated.

| Primer                                    | Sequence (5' to 3')                      | T <sub>m</sub> (°C) |
|-------------------------------------------|------------------------------------------|---------------------|
| <b>Genotyping</b>                         |                                          |                     |
| HSBP-5'UTR-Fw                             | GTCTCTCATCGCTTTTCGCTG                    | 62.5                |
| HSBP-CDS-Rv                               | AGAGGAACTAGCCGGTGTTTT                    | 59.3                |
| <b>Cloning</b>                            |                                          |                     |
| HSBP-CDS-NcoI-Fw                          | TCT <u>CCATGG</u> GATGGTCATGATTCTGAGGATA | 70.8                |
| HSBP-CDS-NcoI-Rv                          | TCT <u>CCATGG</u> CAGAGGAACTAGCCGGTGTTT  | 75.2                |
| HSBP-Pro-XhoI-Fw                          | TCT <u>CTCGAGT</u> GGAAGCCGAGACTGTAGAAG  | 71.3                |
| HSBP-Pro-NcoI-Rv                          | TCT <u>CCATGG</u> CAGAGGAACTAGCCGGTGTTT  | 75.2                |
| AtHSBP <sub>38-86</sub> -Fw               | TCT <u>GAATTC</u> ATCACAAAGATTGATGACATGG | 57.4                |
| AtHSBP <sub>39-86</sub> -Rv               | TCT <u>GAATTC</u> AGAGGAACTAGCCGGTGTTTT  | 59.3                |
| <b>Mutation of S35A</b>                   |                                          |                     |
| HSBP-CDS-NcoI-Fw                          | TCT <u>CCATGG</u> GATGGTCATGATTCTGAGGATA | 70.8                |
| HSBP-CDS-NcoI-Rv                          | TCT <u>CCATGG</u> CAGAGGAACTAGCCGGTGTTT  | 75.2                |
| S35A-Fw                                   | CAGACAATGGCCGACTCCATCATCACAAAG           | 74.7                |
| S35A-Rv                                   | GATGGAGTCGGCCATTGTCTGGAACCTGGT           | 77.2                |
| <b>Real-Time Quantitative PCR</b>         |                                          |                     |
| <i>AtHSP101</i> (At1g74310)               | CACCTCCTTGCAGGGCTAACT                    | 62.9                |
|                                           | CGAACACCACAATCTCGTCAA                    | 62.1                |
| <i>AtHSP70</i> (At2g32120)                | GGATGAGATATACAAAGGCGTGAA                 | 61.5                |
|                                           | AGGTGTGGCTTGTATGGTTAACAG                 | 61.5                |
| <i>AtsHSP18.2</i> (At5g59720)             | GGATTCTTCACGCCATCTTCTG                   | 63.2                |
|                                           | ATGTGCCTCCGGCGTTT                        | 62.3                |
| <i>AtsHSP17.4</i> (At3g46230)             | CGTGTTTCGACCCATTTTCACT                   | 62.2                |
|                                           | CCTCCAGTCCACTTTAGCGTTT                   | 61.9                |
| <i>AtACT2</i> (At3g18780)                 | TTGCACCAAGCAGCATGAA                      | 62.6                |
|                                           | GCTGAGGGAAGCAAGAATGG                     | 62.2                |
| <i>AtPP2A</i> (At1g13320)                 | CCTGCGGTAATAACTGCATCT                    | 59.3                |
|                                           | CTTCACTTAGCTCCACCAAGCA                   | 61.8                |
| <i>EFl<math>\alpha</math></i> (At5g60390) | ATTGCCACACCTCTCACATTG                    | 61.0                |
|                                           | ATACCAGCGTCACCATTCTTC                    | 59.0                |
| <b>HSE Probe for EMSA</b>                 |                                          |                     |
| HSE-Fw                                    | GGCGGCTTCAAGAAGCTTCTCTTCAAGAAGCTTCT      | -                   |
| HSE-Rv                                    | GGCGGAGAAGCTTCTTGAAGAGAAGCTTCTTGAAG      | -                   |

Supplemental Figure S1

**A**

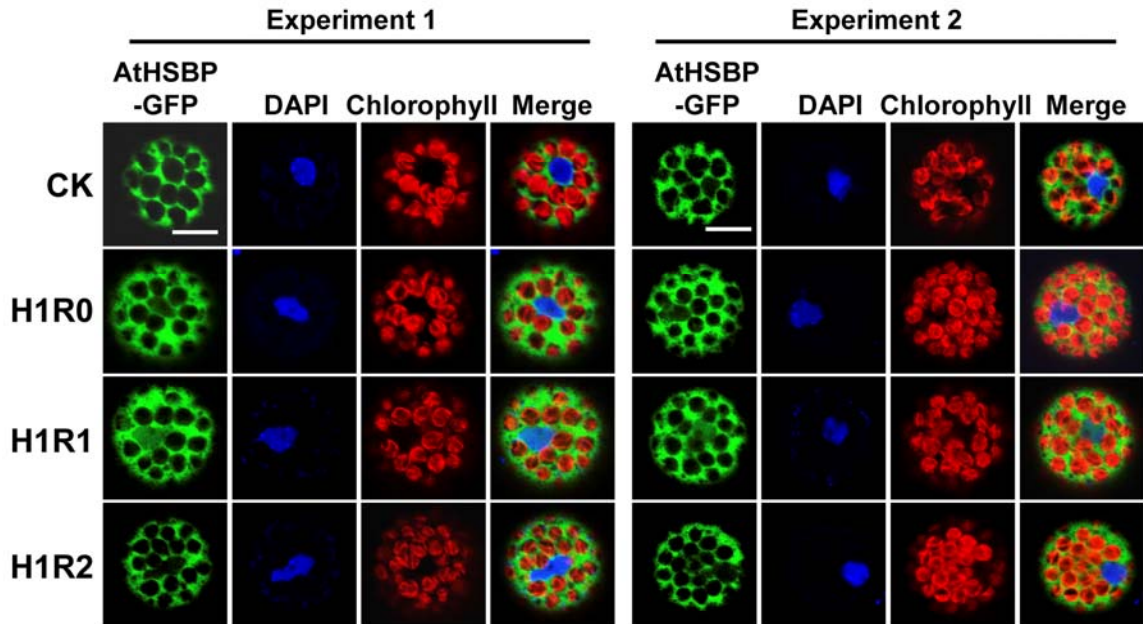

**B**

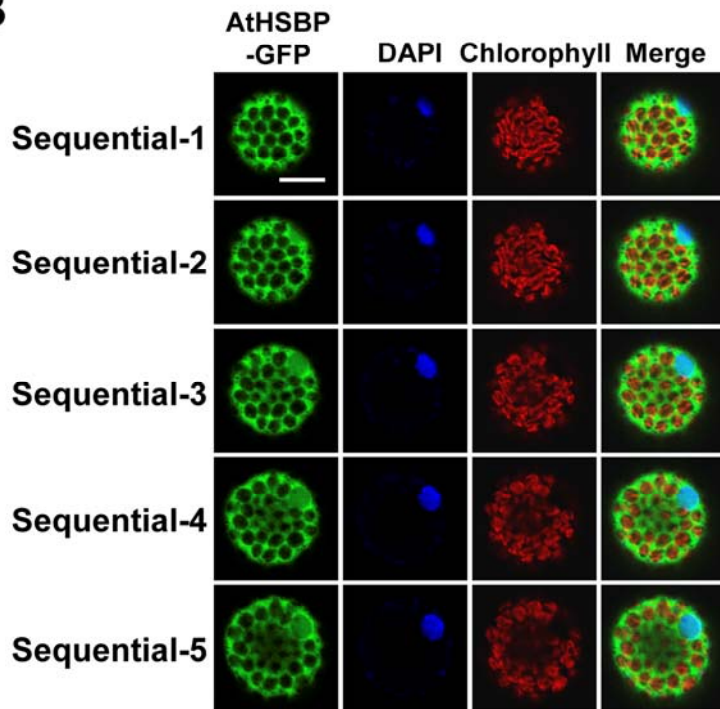

**Supplemental Figure S1. Two independent transient expression experiments of *AtHSBP-GFP* in mesophyll protoplasts.** Wild-type Arabidopsis protoplasts were transfected with the *AtHSBP-GFP* construct and treated without HS (CK) or with HS at 37°C for 1 h (H1R0) and then recovered from HS for 1 h (H1R1) or 2 h (H1R2) as described in Fig. 5A. A, Two independent experiments with similar results are shown in Fig. 5A. B, Five continuous confocal scans with 1 μm optical sectioning thickness and the confocal plane of sequential-3 as the representative shown in Fig. 5A, H1R1. Scale bars indicate 20 μm.

## Supplemental Figure S2

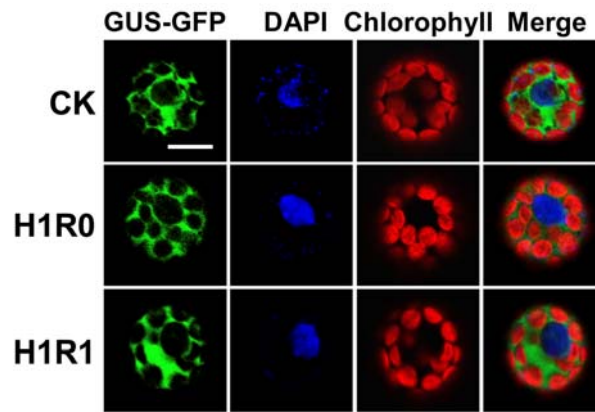

**Supplemental Figure S2. Transient expression of a control construct, *GUS-GFP*, in mesophyll protoplasts.** Wild-type mesophyll protoplasts were transfected with the *GUS-GFP* construct and were treated without HS (CK) or with HS at 37°C for 1 h (H1R0) then recovered from HS for 1 h (H1R1). Similar results were obtained from 3 independent replicates, and representative images are shown. The scale bar indicates 20  $\mu\text{m}$ .

### Supplemental Figure S3

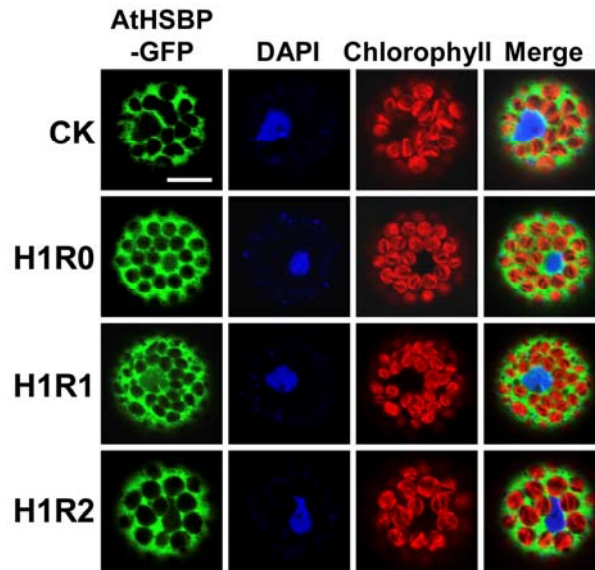

**Supplemental Figure S3. Transient expression of the *AtHSBP-GFP* in *Athsbp-1* mutant mesophyll protoplasts.** The *Athsbp-1* protoplasts were transfected with the construct of *AtHSBP-GFP*, and treated without HS (CK) or with HS at 37°C for 1 h (H1R0) and then recovered from HS for 1 h (H1R1) or 2 h (H1R2) as described in Fig. 5. The scale bar indicates 20  $\mu$ m.



Supplemental Figure S4

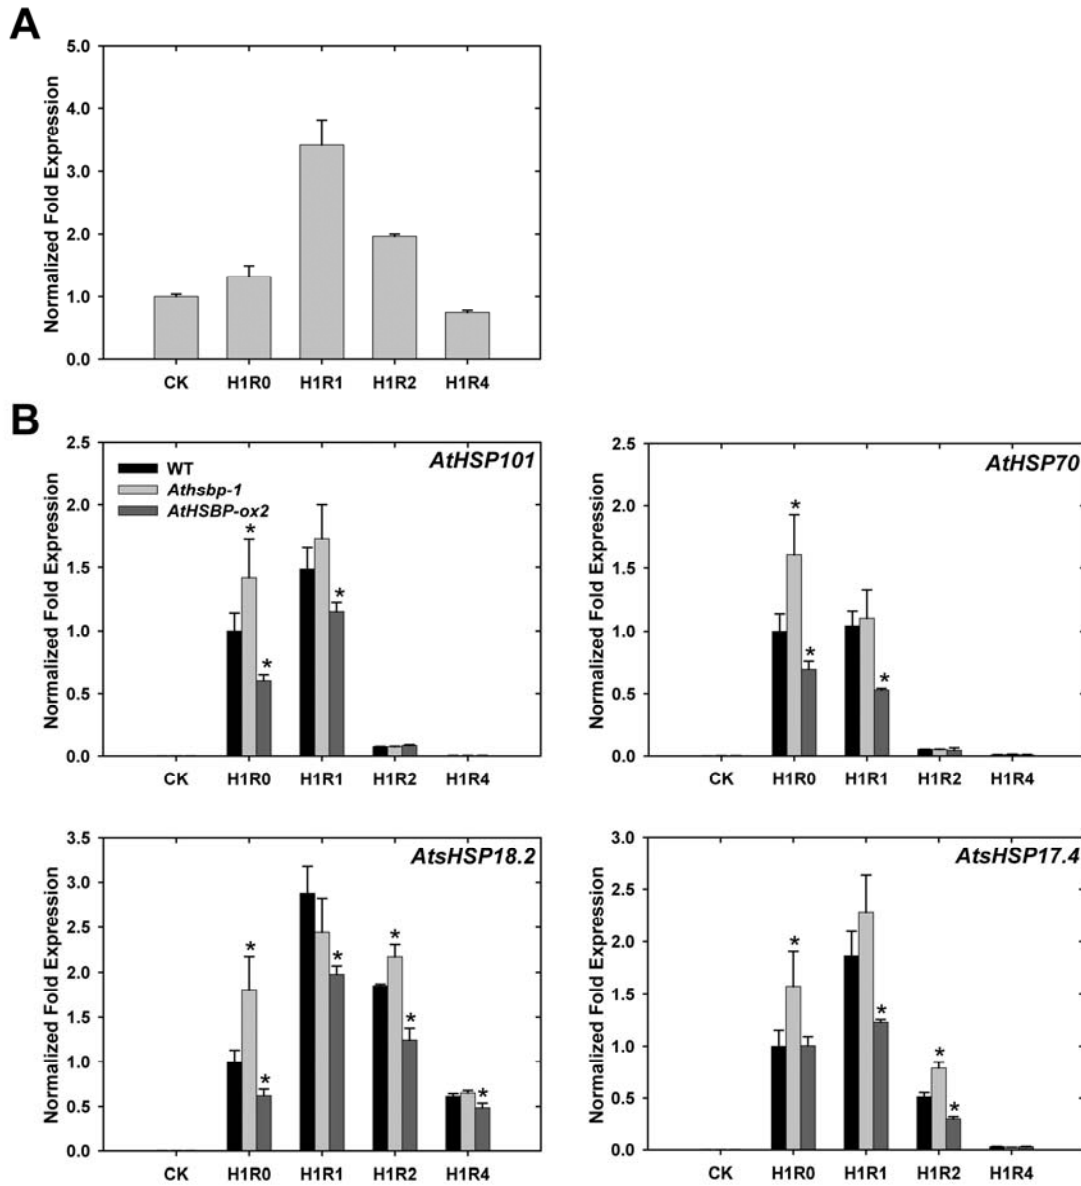

Supplemental Figure S4. *AtHSBP* and *HSP* gene expression were analyzed by real-time quantitative PCR and normalized by the internal control, *EF1α*. *EF1α* (At5g60390) transcript was the quantitative control compared with *AtACT2* for *AtHSBP* (A) and *HSP* (B) gene expression analysis, as shown in the Figs. 2A and 8A, respectively.
